# Supplementary material
Source: MDPI journal article supplement (https://www.mdpi.com/2076-3417/7/10/998)
Supplement: s1 [file s1]

Archive with 2 entries (2 files):
- applsci-215569 Supplementary update.pdf
- 3T3 fibroblast detachment.wmv
