# Supplementary material
Source: MDPI journal article supplement (https://www.mdpi.com/2076-3417/7/10/998)
Supplement: s1 [file s1 › applsci-215569 Supplementary update.pdf]

# Supplementary Materials: Organic Electrochemical Transistor Microplate for Real-Time Cell Culture Monitoring

Ota Salyk <sup>1,\*</sup>, Jan Vítěček <sup>2</sup>, Lukáš Omasta <sup>1</sup>, Eva Šafaříková <sup>2</sup>, Stanislav Striteský <sup>1</sup>, Martin Vala <sup>1</sup> and Martin Weiter <sup>1</sup>

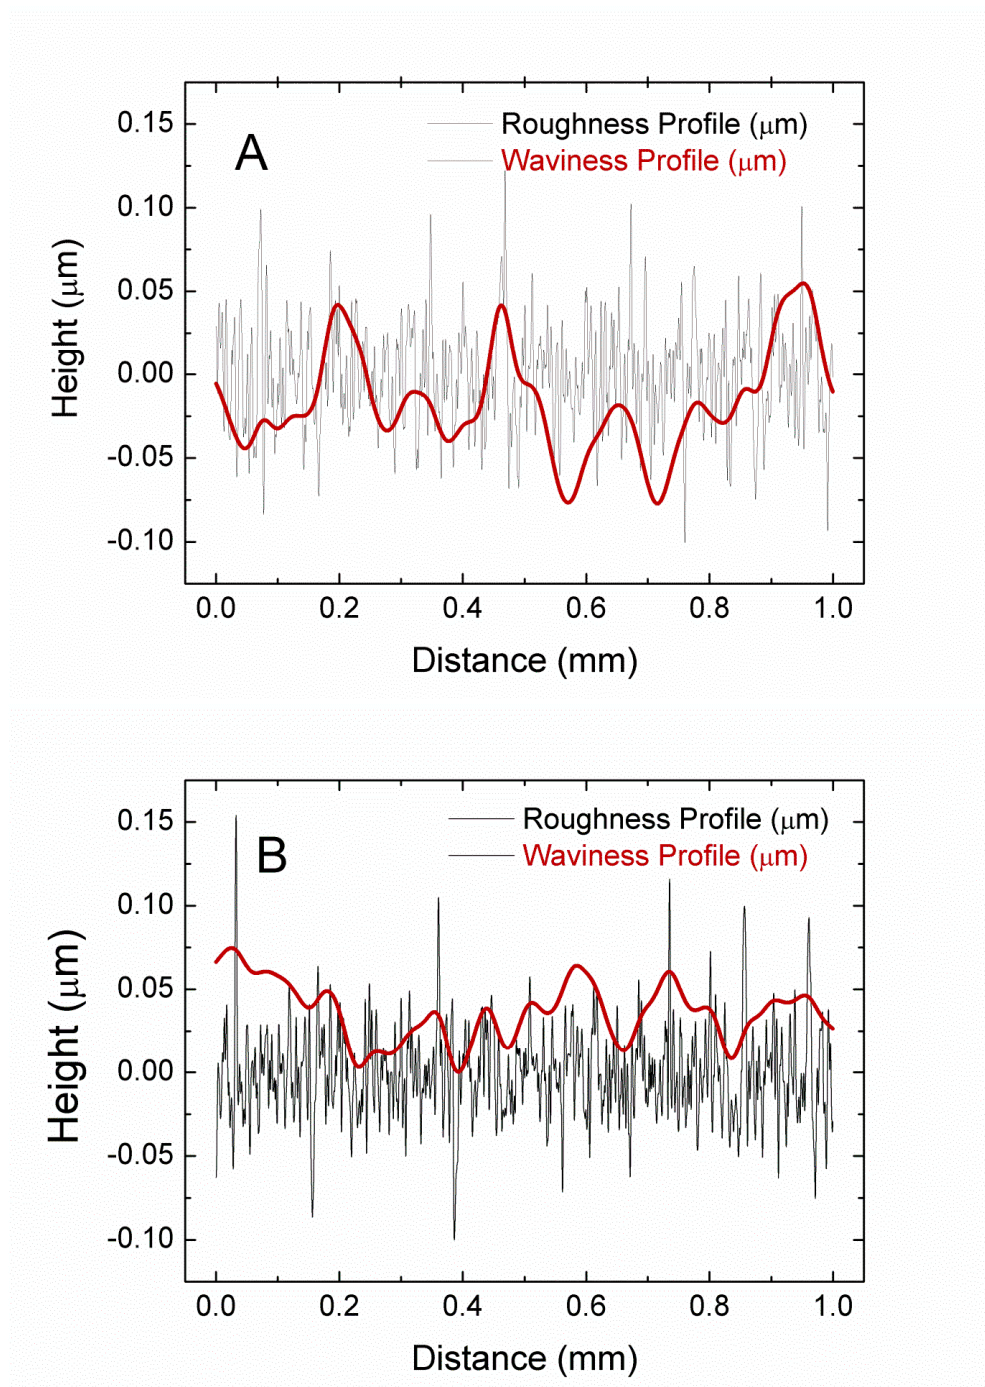

**Figure S1.** Profile of screen printed PEDOT:PSS layer Clevios SV3. The comparison of the profile of the resulting layer (**A**) using non stirred (as obtained) and (**B**) stirred paste. (The record from the profilometer DetakXT (Bruker)).

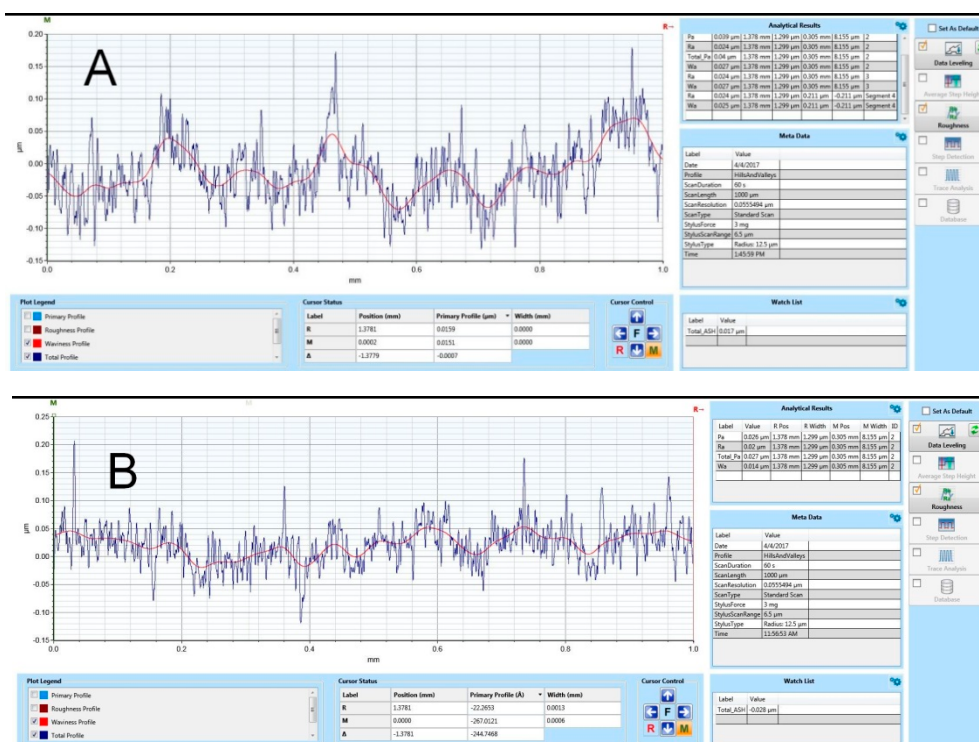

**Figure S2.** Profile of screen printed PEDOT:PSS layer Clevis SV3. The comparison of the profile of the resulting layer (A) using non-stirred (as obtained) and (B) stirred paste. (The record from the profilometer DetakXT (Bruker)).

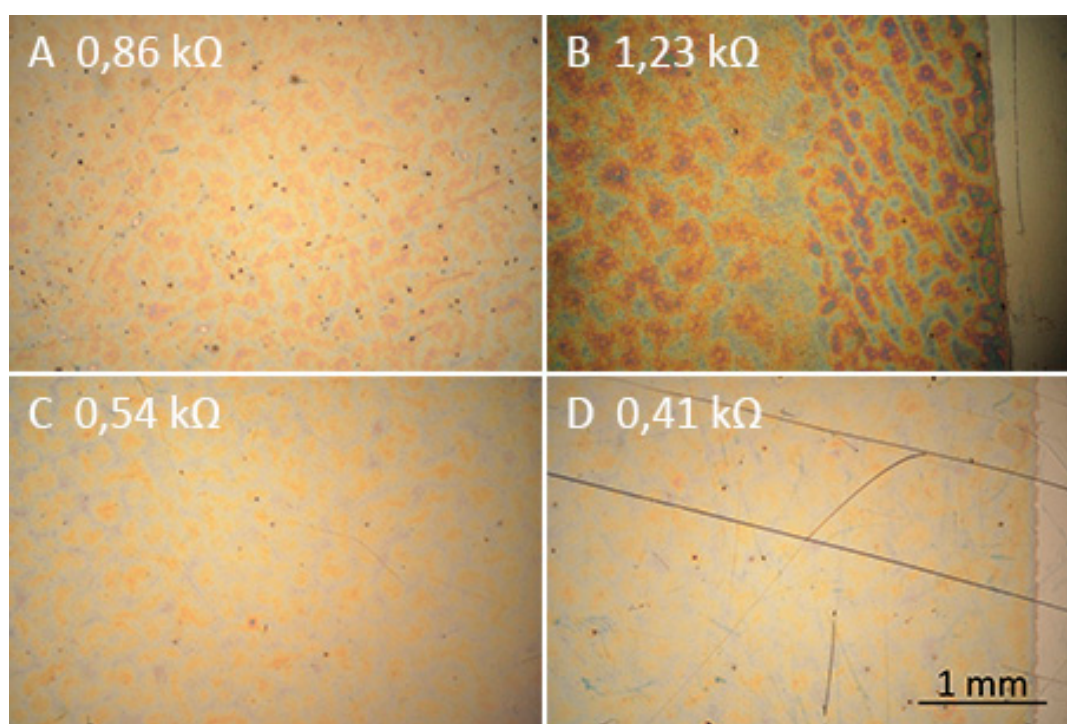

**Figure S3.** Screen printed layers with channel resistances of stirred PEDOT:PSS paste Clevis SV3 (A) non stirred, (B) stirred 30 min. (C) stirred 2 hours, (D) stirred 3 days.

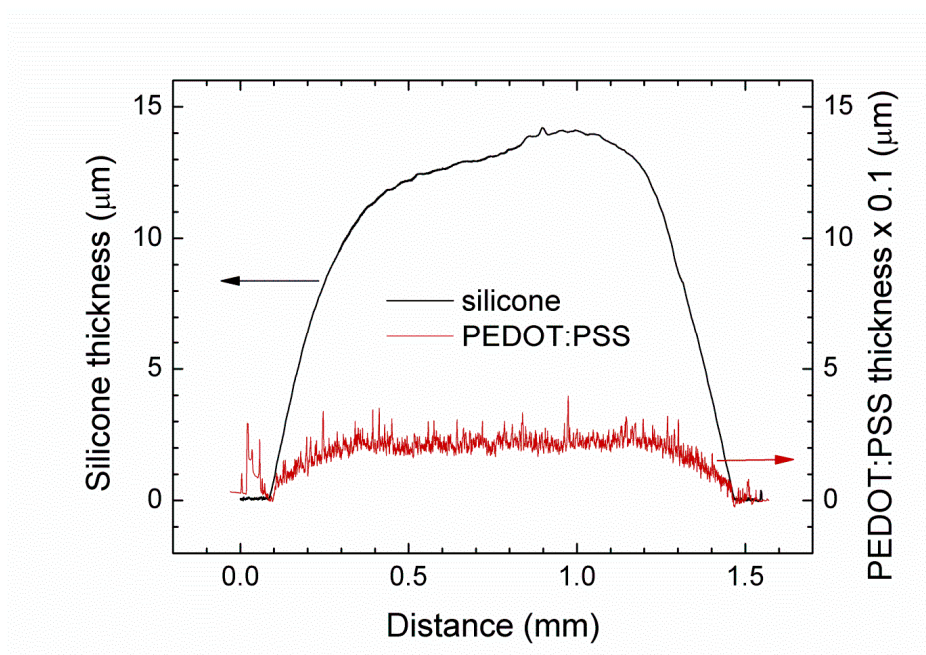

**Figure S4.** Thickness and roughness of screen printed PEDOT:PSS and silicone layers.

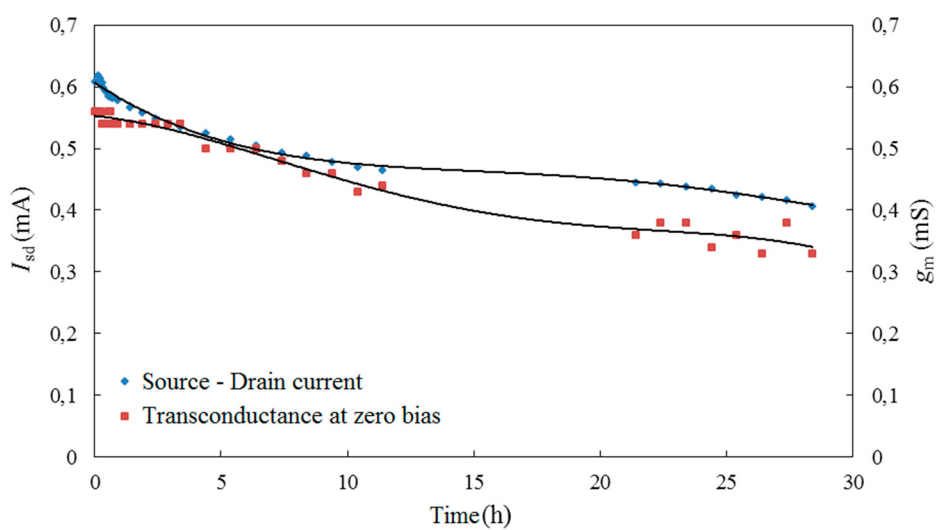

**Figure S5.** PEDOT:PSS OECT degradation at  $V_{ds} = -0,735$  V and  $V_{gs} = 0$  V in PBS solution.
